# Supplementary material for: Supporting direct support professionals in enabling people with intellectual disabilities to engage in meaningful activities: protocol for the Meaningful Activities 4 All (MA4A) study based on the human-centred design process
Source: HighWire-hosted journal article supplement (doi:10.1136/bmjopen-2022-061736), 2022-08-01
Supplement: bmjopen-2022-061736supp001_data_supplement.pdf [file bmjopen-2022-061736supp001_data_supplement.pdf]

## INTERVIEW GUIDE

**Important: when answering the questions, think about an average day. Do not think of a special day that only goes on once a year.**

### Introduction question

- Can you introduce yourself briefly?
- Can you briefly present the organisation you work for?
  - *If the function and job description are not clear; "Can you describe your job within the organisation?"*

### Transition question

- How did you end up in an organisation for adults with intellectual disabilities?
  - *If length of employment was not mentioned, "How long do you work with people with intellectual disabilities?"*
  - *Have you consciously chosen for people with intellectual disabilities? Why did you or why didn't you?*

### Key questions

- How would you describe your job?
  - *Can you give an example of an average day?*
- How do you experience working with adults with intellectual disabilities?
  - *What roles do you take on as a professional caregiver?*
- What do you think your interventions/activities mean for the person with intellectual disabilities?
  - *Can you give an example of a situation in which this is reflected?*
- What are ideal activities for persons with intellectual disabilities according to you?
  - *What conditions should be met to describe it as meaningful daycare?*
- When are activities no longer meaningful?
- What are contributing factors in enabling meaningful activities?
- What are obstructing factors in enabling meaningful activities?
- What support do you need in enabling meaningful activities for adults with intellectual disabilities?
  - *Where do you feel insecure in enabling meaningful activities?*
  - *What information do you still require concerning meaningful activities?*

### Final question

- How would you describe 'meaningful activities'?
- Are there things you would like to add to this interview?
